# Supplementary material
Source: Springer Nature journal article supplement (https://www.springermedizin.de/resource/supplementary/12936_2014_3221_MOESM1_ESM.pdf/9545322)

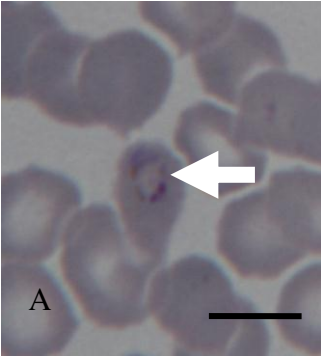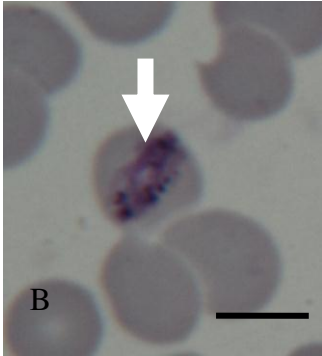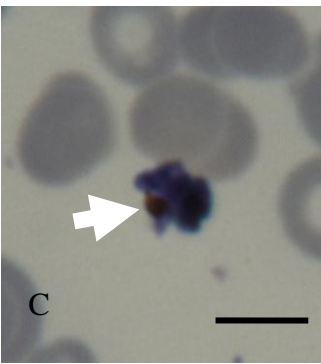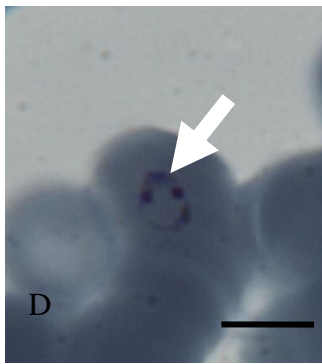

Supplement: MOESM1 [file 9545322]
